# Supplementary material for: Insights into the molecular characteristics of embryonic cranial neural crest cells and their derived mesenchymal cell pools
Source: Springer Nature journal article supplement (doi:10.1038/s42003-024-07056-x), 2024-10-18
Supplement: 42003_2024_7056_MOESM2_ESM.pdf [file 42003_2024_7056_MOESM2_ESM.pdf]

# 1 Description of Additional Supplementary 2 Files

3

4 **File name:** Supplementary Data 1

5 **Description:** The source data behind the Figure 6 in the paper.

6

7
